# Supplementary material for: Loop-mediated isothermal amplification (LAMP) assay—A rapid detection tool for identifying red fox (Vulpes vulpes) DNA in the carcasses of harbour porpoises (Phocoena phocoena)
Source: PLOS journal article supplement (doi:10.1371/journal.pone.0184349), 2017-09-01
Supplement: S1 (10.1371/journal.pone.0184349.s001) [file journal.pone.0184349.s001]

**S1 Table. Dog breed samples (n=19) investigated in the present study as negative controls for the exclusivity test.**

| <b>Gender</b>    | <b>Breed</b>              |
|------------------|---------------------------|
| Male             | Springer Spaniel          |
| Castrated female | Schnauzer                 |
| Female           | Great Dane                |
| Male             | Jack Russel Terrier       |
| Male             | Eurasier                  |
| Castrated male   | Crossbreed                |
| Female           | Labrador Retriever        |
| Female           | Crossbreed                |
| Male             | Crossbreed                |
| Male             | Cairn Terrier             |
| Female           | Yorkshire Terrier         |
| Male             | Beagle                    |
| Female           | French Bulldog            |
| Female           | Labrador Retriever        |
| Male             | Dogo Argentino            |
| Male             | Tibetan Mastiff (Do Khyi) |
| Female           | Beagle                    |
| Female           | Affenpinscher             |
| Male             | Lagotto Romagnolo         |
